# Supplementary material
Source: Springer Nature journal article supplement (https://www.springermedizin.de/resource/supplementary/12885_2007_869_MOESM19_ESM.pdf/9470540)

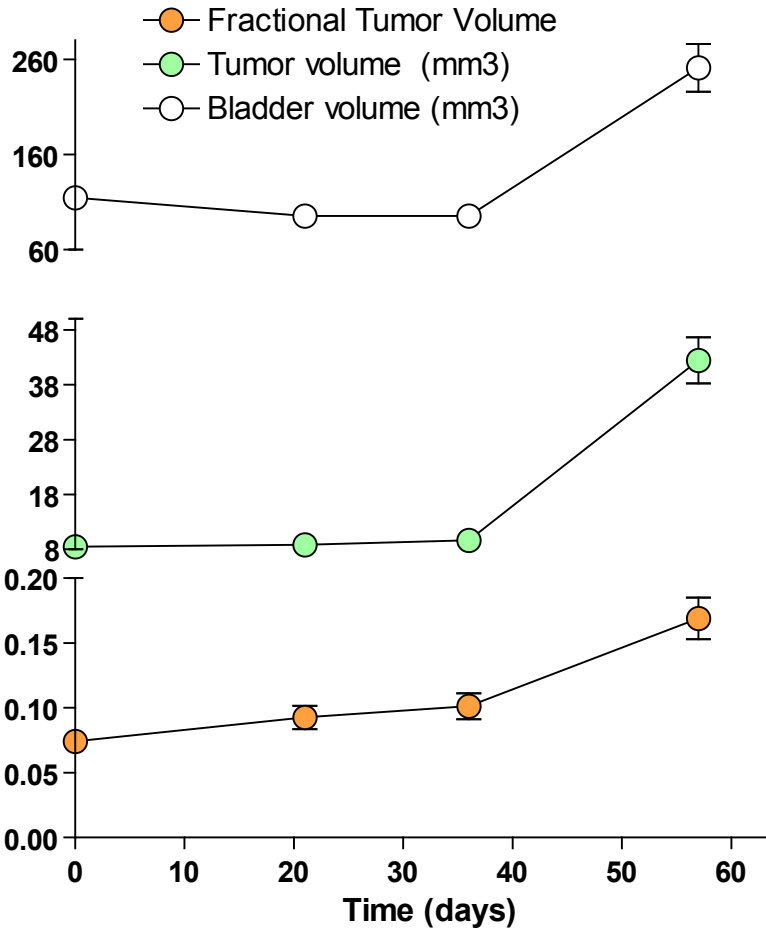

Supplement: MOESM19 [file 9470540]
